# Supplementary material for: Predictors and Mortality of Rapidly Progressive Interstitial Lung Disease in Patients With Idiopathic Inflammatory Myopathy: A Series of 474 Patients
Source: PubMed Central journal article supplement (PMC7412929; doi:10.3389/fmed.2020.00363), 2020-07-31
Supplement: Table_1.pdf [file Table_1.pdf]

Table S1. Comparison of lymphocytes in BALF in survived and non-survived patients with RP-ILD

|                                | RP-ILD (n=78/117)   |                         | <i>P</i> -value |
|--------------------------------|---------------------|-------------------------|-----------------|
|                                | Survived<br>n=66/85 | Non-Survived<br>n=12/32 |                 |
| Lymphocytes in BALF<30% (n, %) | 22 (33.3)           | 10 (83.3)               | 0.003*          |
| Lymphocytes in BALF≥30% (n, %) | 44 (66.7)           | 2 (16.7)                | 0.003*          |

\*<0.05. RP-ILD, rapidly progressive interstitial lung disease; BALF, bronchoalveolar lavage fluid.

Table S2. Comparison of lymphocytes in BALF in survived and non-survived patients with C-ILD

|                                | C-ILD (n=97/191)     |                        | <i>P</i> -value |
|--------------------------------|----------------------|------------------------|-----------------|
|                                | Survived<br>n=90/176 | Non-Survived<br>n=7/15 |                 |
| Lymphocytes in BALF<30% (n, %) | 73 (81.1)            | 7 (100.0)              | 0.348           |
| Lymphocytes in BALF≥30% (n, %) | 17 (18.9)            | 0 (0.0)                | 0.348           |

C-ILD, chronic interstitial lung disease; BALF, bronchoalveolar lavage fluid.
